# Supplementary material for: Longitudinal copy number, whole exome and targeted deep sequencing of 'good risk' IGHV-mutated CLL patients with progressive disease
Source: PubMed Central journal article supplement (PMC4861248; doi:10.1038/leu.2016.10), 2016-02-26
Supplement: NIHMS66639-supplement-Figure_S1.pdf [file NIHMS66639-supplement-Figure_S1.pdf]

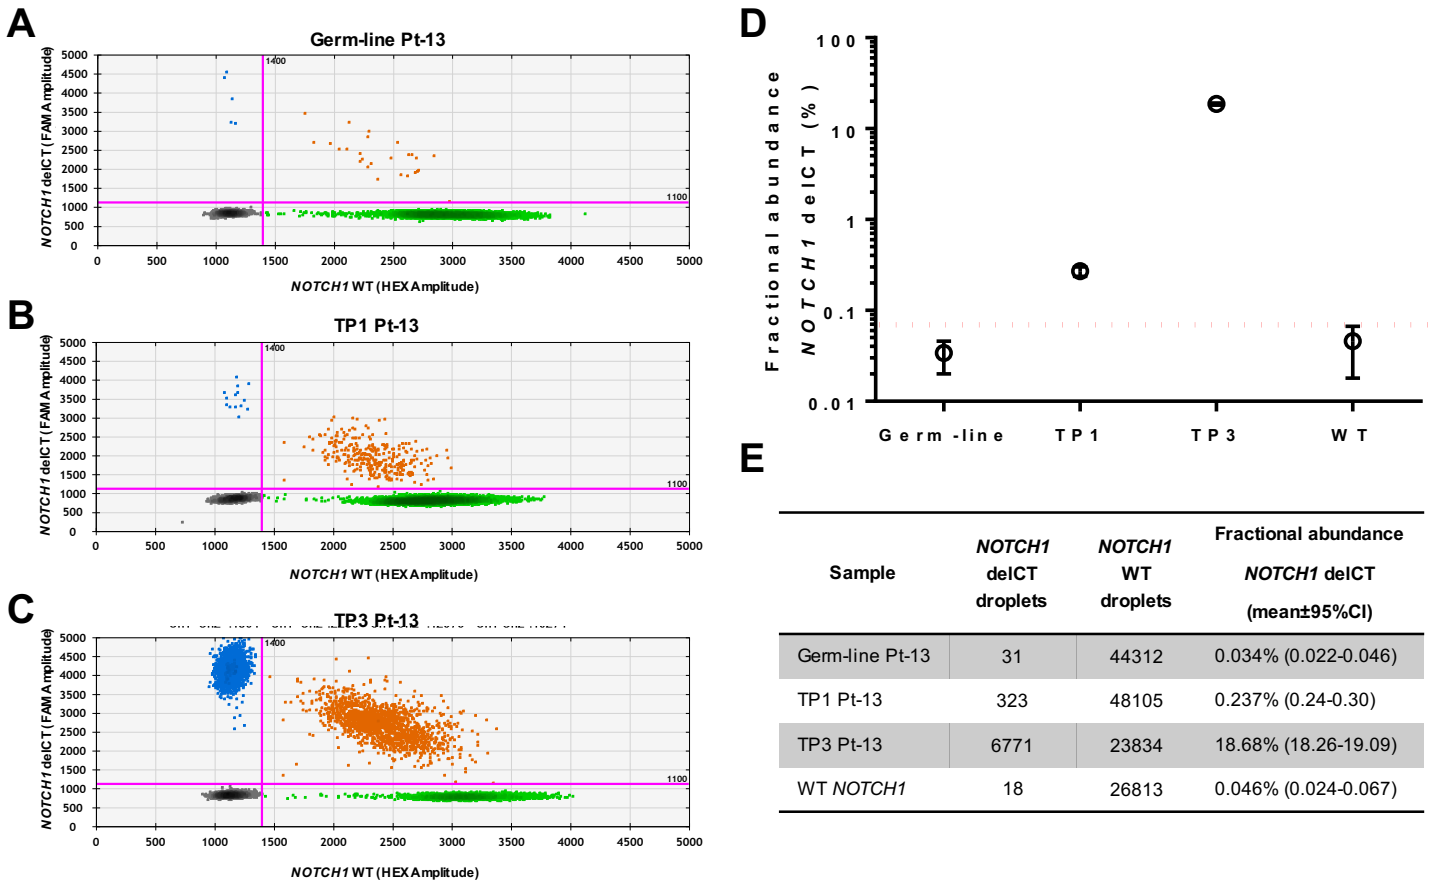

**Supplemental Figure 1: Droplet-digital PCR analysis of the *NOTCH1* delCT mutation in Patient-13 (5 x 50 ng of gDNA template/PCR). (A-C) X/Y-scattergraph of mutant positive (blue), mutant-wildtype double-positive (orange), wildtype positive (green) and negative droplets (black) Pink lines are user-defined thresholds for each droplet cluster (D) Fractional abundance of mutant droplets in Germ-line, tumour TP1 and TP3 gDNA template from Patient-13 and a NGS *NOTCH1* wildtype CLL control sample (E) Table displaying the droplet number for each sample in D and fractional abundance estimates (with 95% Confidence Intervals).**
