# Supplementary material for: Longitudinal copy number, whole exome and targeted deep sequencing of 'good risk' IGHV-mutated CLL patients with progressive disease
Source: PubMed Central journal article supplement (PMC4861248; doi:10.1038/leu.2016.10), 2016-02-26
Supplement: NIHMS66639-supplement-Figure_S2.pdf [file NIHMS66639-supplement-Figure_S2.pdf]

## PAX5 enhancer region

Patient-2 chr9:37371728 A>G

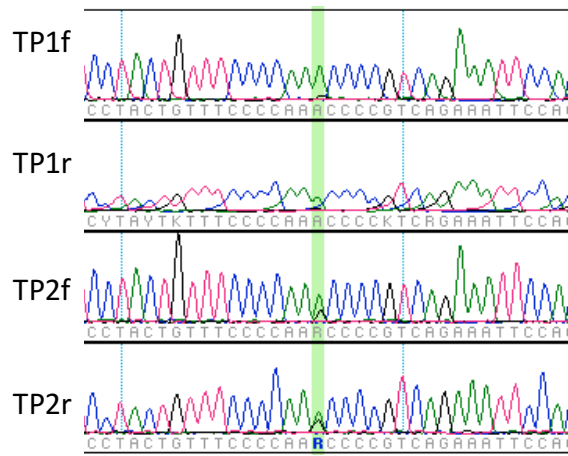

Patient-4 chr9:37371839 A>T

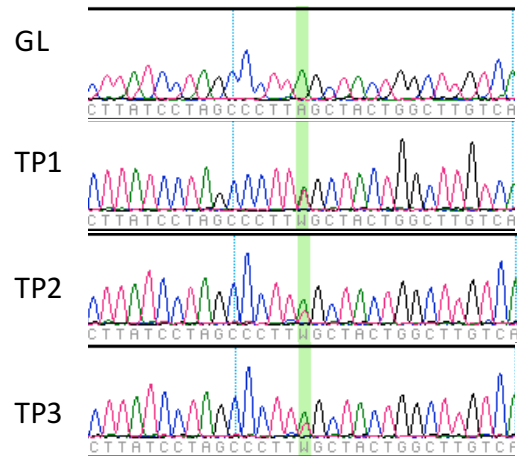

Patient-6 chr9:37371686 G>A

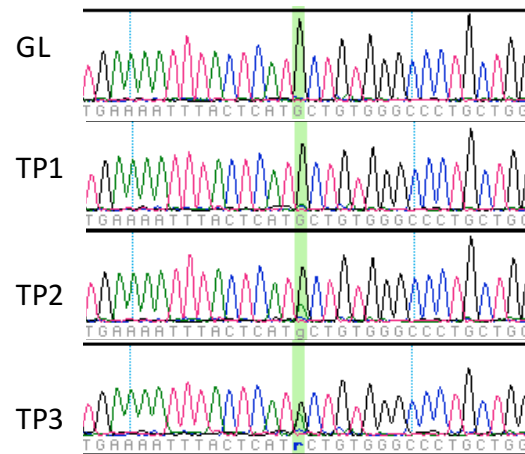

## hsa-mir-142

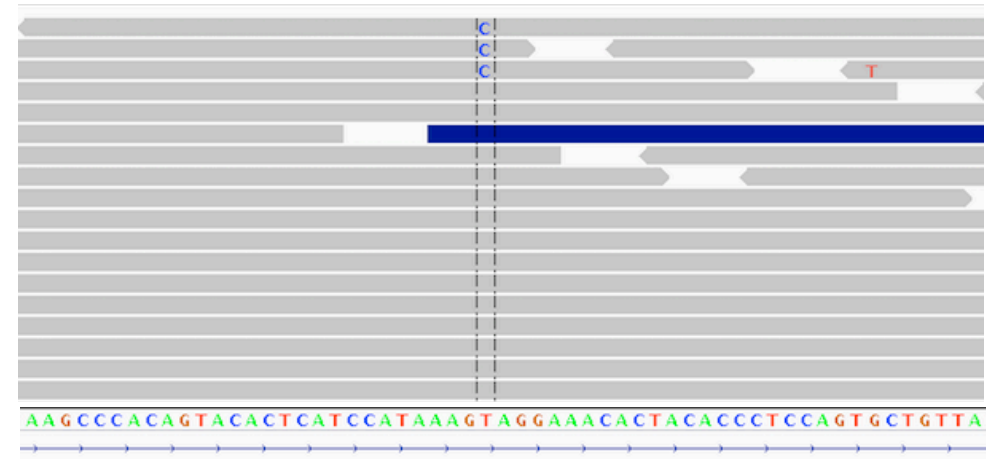

>hsa-mir-142 MI0000458

GACAGUGCAGUCACCCAUAAGUAGAAAGCACUACUACAGCACUGGAGGGUGUAGUGUUUCU [A>G] CUUUUUGGAUGAGUGUACUGUG

```

      g       g   c           a           uaa ag a
5'  acagugca uca ccauaaaguag aagcacuac  c c c
      ||||| ||| ||||| ||||| ||||| ||||| |||
3'  ugucaugu agu gguuuuucAuc uuugugaug  g g u
      g       g   a           c           -ug ga g
    
```

chr17:56408615 T>C 6% VAF (3/51 WES reads) in Patient-11 TP2 sample
