# Supplementary material for: Longitudinal copy number, whole exome and targeted deep sequencing of 'good risk' IGHV-mutated CLL patients with progressive disease
Source: PubMed Central journal article supplement (PMC4861248; doi:10.1038/leu.2016.10), 2016-02-26

# A Pre-treatment

# B Post-treatment

Static

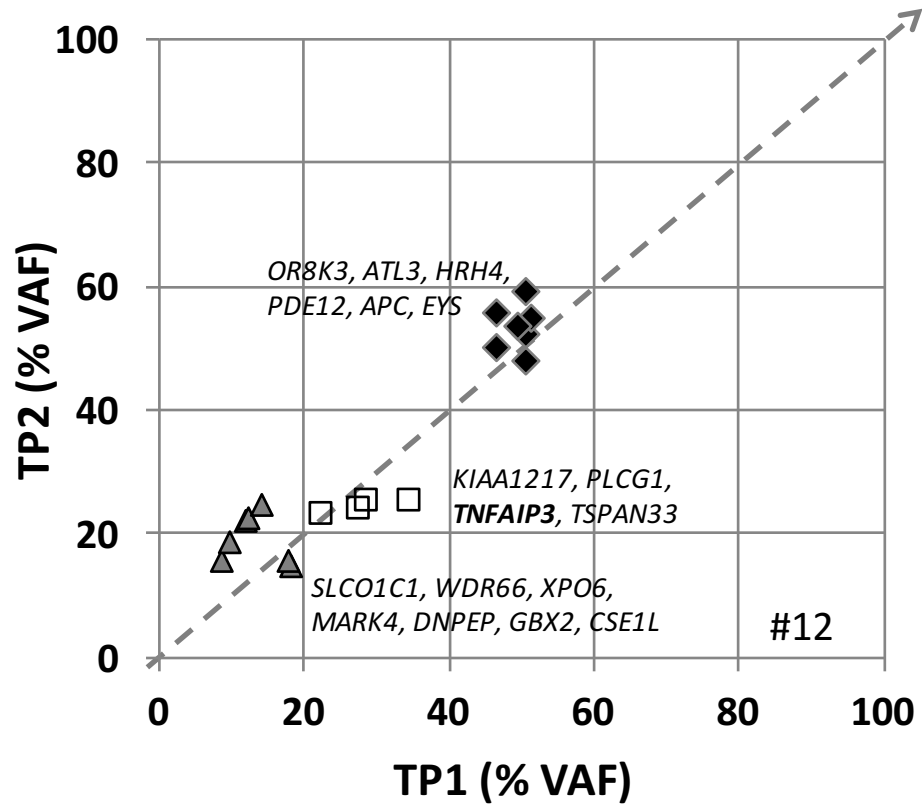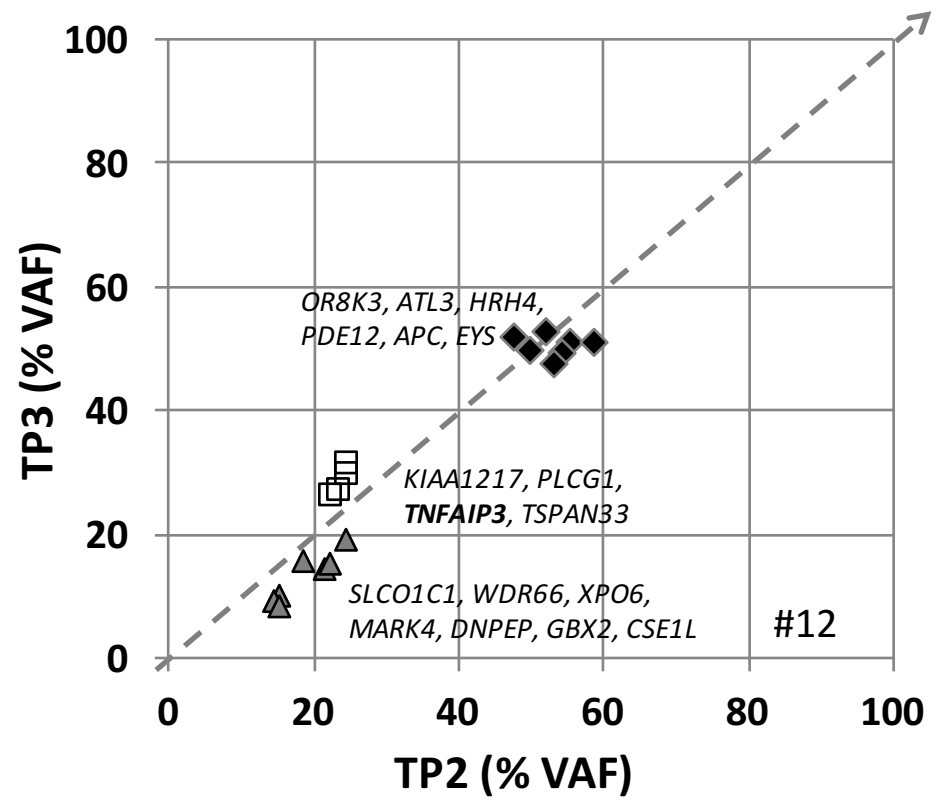

Expanding

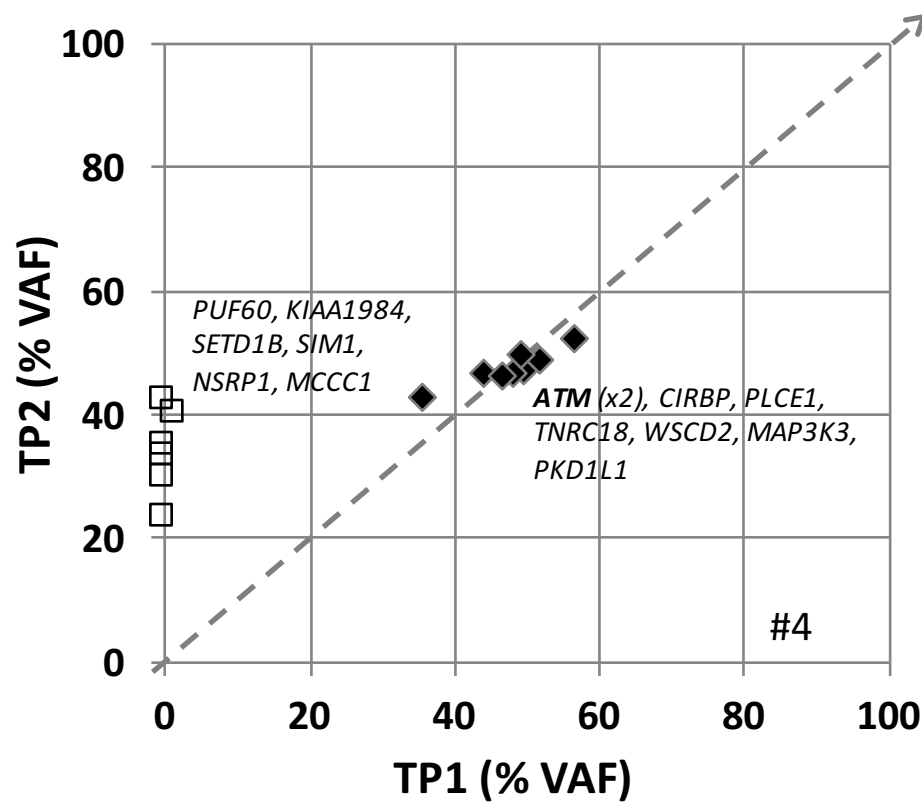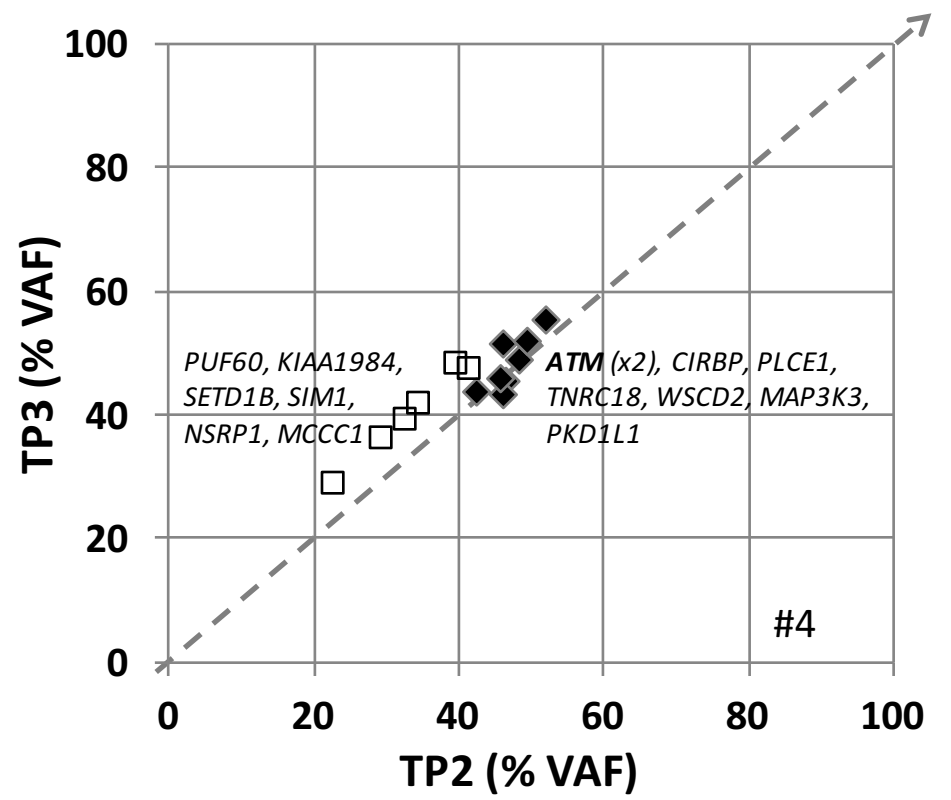

Evolving

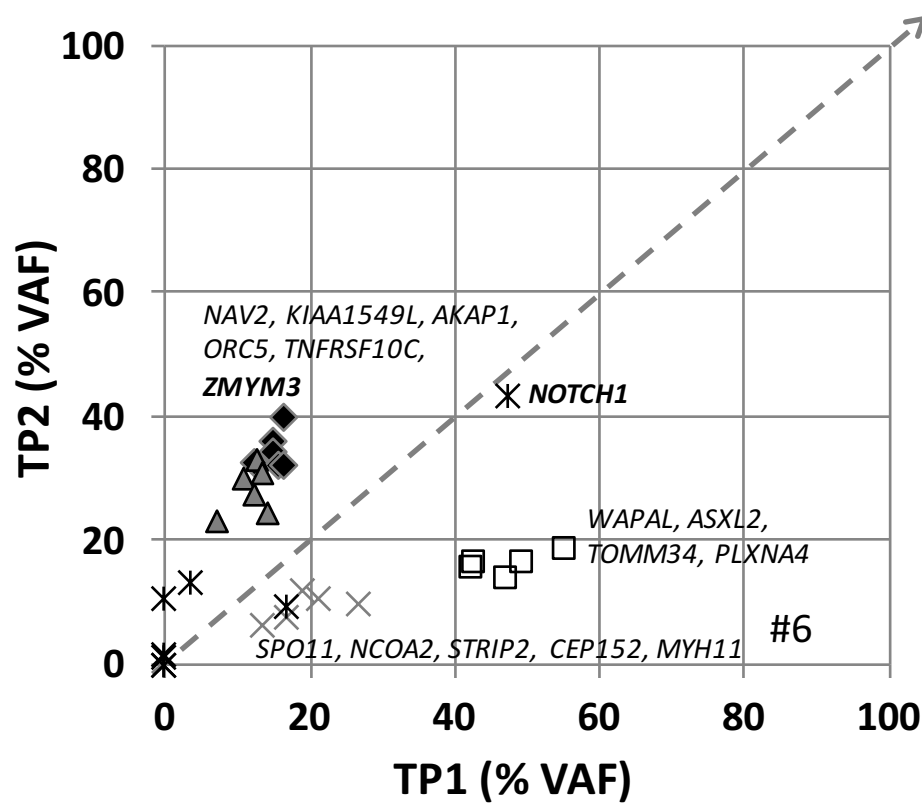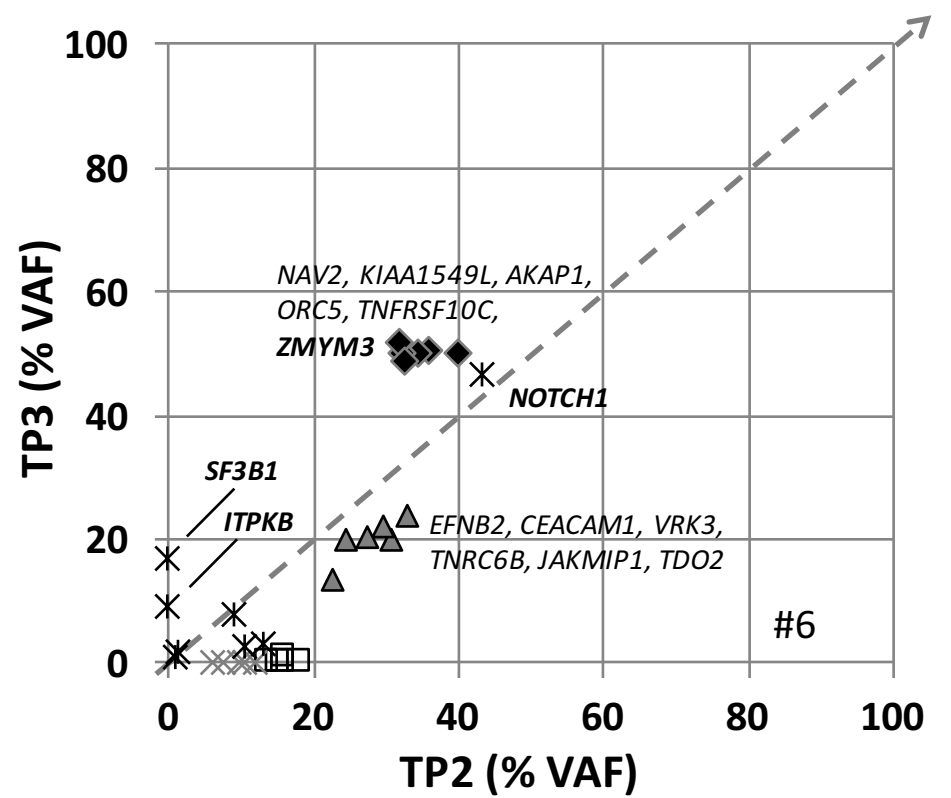

Supplement: NIHMS66639-supplement-Figure_S3.pdf [file NIHMS66639-supplement-Figure_S3.pdf]
