# Supplementary material for: Longitudinal copy number, whole exome and targeted deep sequencing of 'good risk' IGHV-mutated CLL patients with progressive disease
Source: PubMed Central journal article supplement (PMC4861248; doi:10.1038/leu.2016.10), 2016-02-26
Supplement: NIHMS66639-supplement-Figure_S4.pdf [file NIHMS66639-supplement-Figure_S4.pdf]

# Patient-1

## SciClone analysis

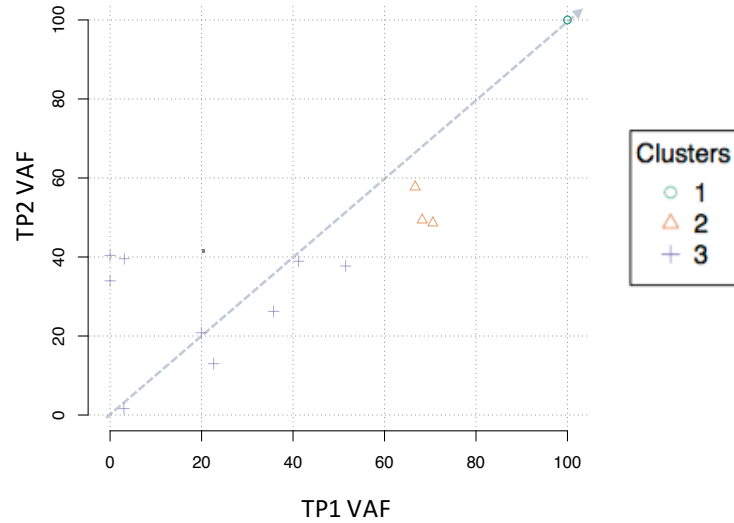

| Gene      | TP1.vaf | TP1.depth | TP2.vaf | TP2.depth | cluster | cluster.prob.1 | cluster.prob.2 | cluster.prob.3 |
|-----------|---------|-----------|---------|-----------|---------|----------------|----------------|----------------|
| TEAD4     | 20.33   | 1756      | 41.42   | 2636      | 0       | NA             | NA             | NA             |
| MAGEE1    | 100     | 568       | 100     | 2021      | 1       | 1.000000001    | 1.00E-09       | 1.00E-09       |
| MAGEE1    | 100     | 2646      | 100     | 3590      | 1       | 1.000000001    | 1.00E-09       | 1.00E-09       |
| MAGEC3    | 100     | 833       | 100     | 759       | 1       | 1.000000001    | 1.00E-09       | 1.00E-09       |
| CHD2      | 66.71   | 1361      | 57.73   | 1639      | 2       | 1.00E-09       | 1.000000001    | 1.00E-09       |
| DSEL      | 68.24   | 5478      | 49.36   | 7581      | 2       | 1.00E-09       | 1              | 2.11E-09       |
| ARFGEF1   | 70.57   | 1695      | 48.62   | 2421      | 2       | 1.00E-09       | 0.999999996    | 6.08E-09       |
| PLEKHH1   | 3.12    | 4904      | 39.58   | 3320      | 3       | 1.00E-09       | 1.00E-09       | 1.000000001    |
| GLDN      | 35.74   | 3674      | 26.22   | 4924      | 3       | 1.00E-09       | 1.00E-09       | 1.000000001    |
| PTPRM     | 51.48   | 2255      | 37.71   | 3023      | 3       | 1.00E-09       | 1.03E-09       | 1.000000001    |
| FAM69C    | 0.3     | 6333      | 33.97   | 3232      | 3       | 1.00E-09       | 1.00E-09       | 1.000000001    |
| PIGP;PIGP | 19.95   | 972       | 20.84   | 1027      | 3       | 1.00E-09       | 1.00E-09       | 1.000000001    |
| SLC34A1   | 3.02    | 563       | 1.63    | 429       | 3       | 1.00E-09       | 1.00E-09       | 1.000000001    |
| GPRC6A    | 22.64   | 994       | 13.01   | 1330      | 3       | 1.00E-09       | 1.00E-09       | 1.000000001    |
| THAP5     | 41.21   | 1541      | 38.92   | 2515      | 3       | 1.00E-09       | 1.00E-09       | 1.000000001    |
| MLL3      | 0.73    | 7631      | 40.39   | 4511      | 3       | 1.00E-09       | 1.00E-09       | 1.000000001    |

## Phylosub analysis

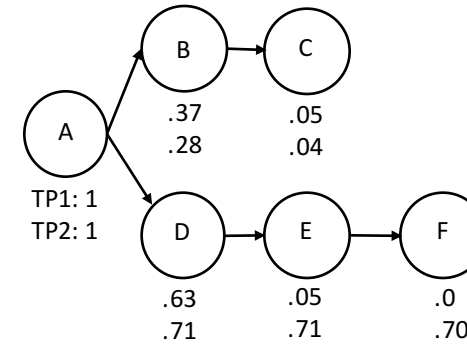

- (A):** *ARFGEF1; CHD2; DSEL; MAGEC3; MAGEE1; PTPRM*
- (B):** *PIGP; GPRC6A*
- (C):** *SLC34A1*
- (D):** *GLDN; TEAD4; THAP5*
- (E):** *PLEKHH1*
- (F):** *MLL3; FAM69C*

# Patient-2

## SciClone analysis

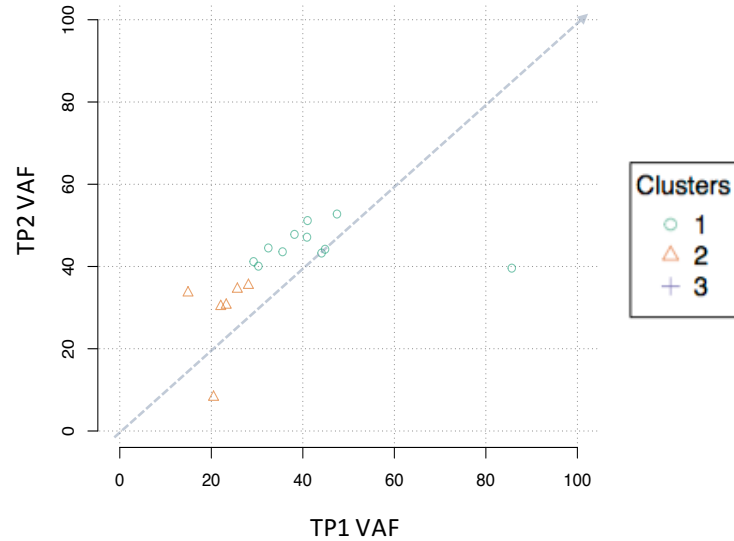

| Gene      | TP1.vaf | TP1.depth | TP2.vaf | TP2.depth | cluster | cluster_prob.1 | cluster_prob.2 |
|-----------|---------|-----------|---------|-----------|---------|----------------|----------------|
| MYD88     | 40.91   | 5092      | 47.13   | 12896     | 1       | 0.999966759    | 3.32E-05       |
| PFKFB4    | 41.03   | 1735      | 51.17   | 4884      | 1       | 0.999942136    | 5.79E-05       |
| AMZ1      | 25.69   | 1106      | 44.51   | 2487      | 1       | 0.987121542    | 0.01287846     |
| SMARCD3   | 32.46   | 1257      | 43.27   | 4063      | 1       | 0.999996661    | 3.39E-06       |
| NOTCH1    | 22.06   | 1088      | 39.6    | 2992      | 1       | 1.000000001    | 1.00E-09       |
| GPR158    | 44.09   | 2007      | 40.08   | 5469      | 1       | 0.8463529      | 0.153647102    |
| EMC7      | 85.66   | 2817      | 43.58   | 6737      | 1       | 0.997480142    | 0.00251986     |
| HS3ST6    | 30.29   | 1646      | 52.76   | 4663      | 1       | 0.999999745    | 2.57E-07       |
| KCNJ2     | 20.49   | 613       | 47.81   | 1705      | 1       | 0.99971402     | 0.000285982    |
| KRTAP13-2 | 23.26   | 2863      | 41.19   | 7152      | 1       | 0.854198591    | 0.145801411    |
| SMCR7L    | 14.91   | 2287      | 44.19   | 5698      | 1       | 0.999998682    | 1.32E-06       |
| NEK11     | 35.57   | 2180      | 34.49   | 4697      | 2       | 0.014007375    | 0.985992627    |
| PPP1R9A   | 47.46   | 1818      | 30.29   | 3988      | 2       | 4.13E-05       | 0.999958723    |
| PCDH8     | 38.17   | 683       | 8.22    | 1582      | 2       | 1.00E-09       | 1.000000001    |
| CCDC168   | 29.23   | 2438      | 30.61   | 5002      | 2       | 7.72E-05       | 0.999922773    |
| TCL1A     | 28.11   | 671       | 33.59   | 2054      | 2       | 0.005842621    | 0.994157381    |
| NPTXR     | 44.86   | 157       | 35.43   | 113       | 2       | 0.072718217    | 0.927281785    |

## Phylosub analysis

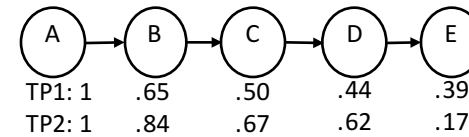

- (A):** MYD88; SMCR7L; PFKFB4; KCNJ2; SMARCD3; HS3ST6
- (B):** AMZ1; NPTXR; EMC7; GPR158; KRTAP13-2
- (C):** NEK11
- (D):** TCL1A; CCDC168; PPP1R9A
- (E):** PCDH8

# Patient-3

## SciClone analysis

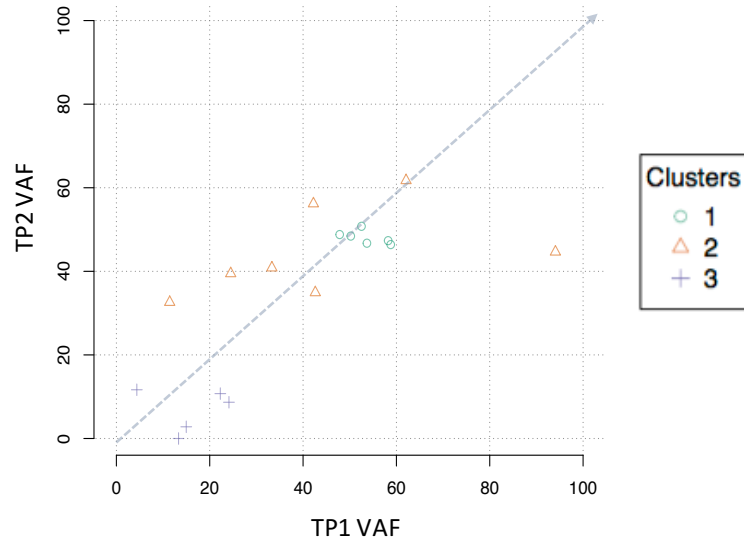

| Gene     | TP1.vaf | TP1.depth | TP2.vaf | TP2.depth | TP3.vaf | TP3.depth | cluster | cluster.prob.1 | cluster.prob.2 | cluster.prob.3 |
|----------|---------|-----------|---------|-----------|---------|-----------|---------|----------------|----------------|----------------|
| NID1     | 52.52   | 3081      | 50.77   | 3327      | 53.85   | 2503      | 1       | 0.983082402    | 0.0169176      | 1.00E-09       |
| CACNB3   | 47.84   | 1674      | 48.8    | 2885      | 51.68   | 2419      | 1       | 0.945114696    | 0.054885306    | 1.00E-09       |
| MYO1H    | 53.68   | 2155      | 46.73   | 1194      | 47.74   | 1552      | 1       | 0.960910152    | 0.03908985     | 1.00E-09       |
| WFS1     | 58.78   | 3270      | 46.4    | 1347      | 57.33   | 1123      | 1       | 0.89180332     | 0.108196682    | 1.00E-09       |
| PTPRK    | 50.22   | 2616      | 48.43   | 3302      | 50.94   | 3799      | 1       | 0.972683574    | 0.027316428    | 1.00E-09       |
| PEX3     | 58.23   | 1642      | 47.34   | 2250      | 48.5    | 2602      | 1       | 0.935232938    | 0.064767064    | 1.00E-09       |
| LRRIQ1   | 42.62   | 1720      | 34.92   | 1538      | 35.28   | 1284      | 2       | 4.15E-07       | 0.999999587    | 1.06E-09       |
| ITGAE    | 24.5    | 5429      | 39.47   | 9734      | 45.06   | 9714      | 2       | 1.00E-09       | 0.999887291    | 0.000112711    |
| CLDN14   | 62.07   | 1221      | 61.74   | 1406      | 65.88   | 1044      | 2       | 0.001048469    | 0.998951533    | 1.00E-09       |
| LTF      | 11.43   | 11995     | 32.6    | 11653     | 41.98   | 10438     | 2       | 1.00E-09       | 0.972513157    | 0.027486845    |
| TRAM1L1  | 33.32   | 1714      | 40.85   | 2610      | 41.05   | 2144      | 2       | 2.03E-08       | 0.999999841    | 1.42E-07       |
| HIST1H3D | 42.22   | 3245      | 56.19   | 2508      | 37.71   | 2814      | 2       | 0.000409301    | 0.999590701    | 1.02E-09       |
| DCAF8L1  | 94.07   | 534       | 44.65   | 457       | 6.96    | 920       | 2       | 1.00E-09       | 1.000000001    | 1.00E-09       |
| SELPLG   | 22.27   | 2420      | 10.74   | 4581      | 3.59    | 5487      | 3       | 1.00E-09       | 1.00E-09       | 1.000000001    |
| CPNE2    | 14.97   | 2806      | 2.8     | 2536      | 0       | 2537      | 3       | 1.00E-09       | 1.00E-09       | 1.000000001    |
| MAML3    | 13.32   | 7260      | 0       | 7259      | 12.8    | 7039      | 3       | 1.00E-09       | 1.00E-09       | 1.000000001    |
| NMUR2    | 4.38    | 1781      | 11.66   | 1595      | 19.76   | 1245      | 3       | 1.00E-09       | 4.08E-07       | 0.999999594    |
| PRUNE2   | 24.12   | 2629      | 8.67    | 2399      | 4.93    | 1623      | 3       | 1.00E-09       | 1.00E-09       | 1.000000001    |

## Phylosub analysis

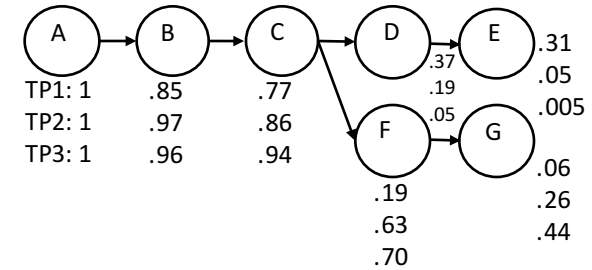

- (A):** CACNB3; CLDN14; MYO1H; NID1; PEX3; PTPRK; WFS1
- (B):** HIST1H3D
- (C):** TRAM1L1; ITGAE; LRRIQ1
- (D):** DCAF8L1; PRUNE2;
- (E):** CPNE2
- (F):** LTF
- (G):** NMUR2

# Patient-5

## SciClone analysis

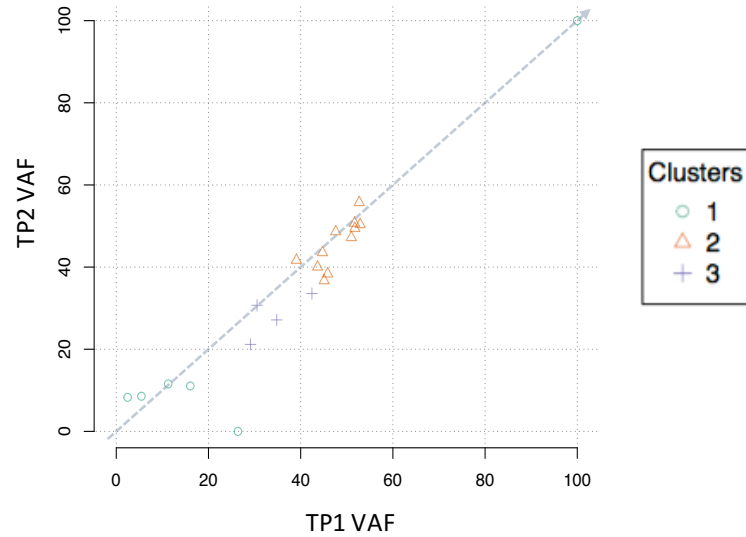

## Phylosub analysis

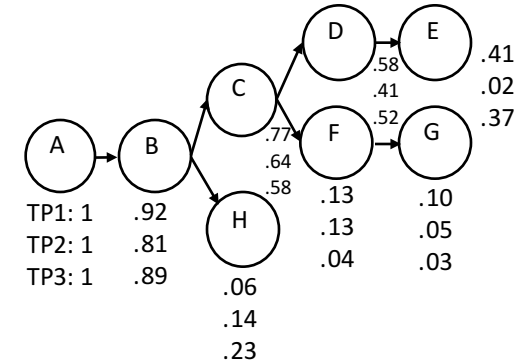

| Gene     | TP1.vaf | TP1.depth | TP2.vaf | TP2.depth | TP3.vaf | TP3.depth | cluster | cluster.prob.1 | cluster.prob.2 | cluster.prob.3 |
|----------|---------|-----------|---------|-----------|---------|-----------|---------|----------------|----------------|----------------|
| SLC8A1   | 2.46    | 3415      | 8.28    | 4396      | 14.9    | 3893      | 1       | 1.000000001    | 1.00E-09       | 1.00E-09       |
| DNMT3B   | 26.39   | 557       | 0       | 577       | 25.89   | 819       | 1       | 1.000000001    | 1.00E-09       | 1.00E-09       |
| SLC38A3  | 5.45    | 275       | 8.55    | 585       | 0       | 584       | 1       | 1.000000001    | 1.00E-09       | 1.00E-09       |
| MAML3    | 11.26   | 5036      | 11.55   | 10390     | 15.06   | 7782      | 1       | 1.000000001    | 1.00E-09       | 1.00E-09       |
| CDX4     | 16.06   | 685       | 11.06   | 1890      | 3.57    | 3866      | 1       | 1.000000001    | 1.00E-09       | 1.00E-09       |
| NAP1L3   | 100     | 1550      | 100     | 3080      | 90.92   | 2678      | 1       | 1.000000001    | 1.00E-09       | 1.00E-09       |
| JMJD1C   | 51.68   | 3071      | 50.71   | 6391      | 50.02   | 4404      | 2       | 2.33E-05       | 0.999976679    | 1.00E-09       |
| METTL15  | 44.73   | 836       | 43.54   | 455       | 49.21   | 1262      | 2       | 7.65E-06       | 0.999992351    | 1.00E-09       |
| PPP1R13B | 45.09   | 3792      | 36.7    | 2191      | 45.88   | 4714      | 2       | 0.00011221     | 0.999887778    | 1.53E-08       |
| BAIAP3   | 39.08   | 3306      | 41.69   | 8839      | 41.18   | 6282      | 2       | 0.000891572    | 0.999093286    | 1.51E-05       |
| WSCD1    | 51.75   | 4891      | 49.45   | 11223     | 48.14   | 7316      | 2       | 1.24E-05       | 0.99998764     | 1.00E-09       |
| ZNF132   | 47.6    | 5489      | 48.63   | 12881     | 50.13   | 8352      | 2       | 7.24E-06       | 0.999992764    | 1.00E-09       |
| MORC1    | 43.68   | 5733      | 40.03   | 7844      | 42.13   | 8334      | 2       | 8.37E-05       | 0.999916097    | 2.44E-07       |
| HERC6    | 45.86   | 443       | 38.36   | 576       | 46.97   | 688       | 2       | 3.20E-05       | 0.99996801     | 1.18E-09       |
| MCCD1    | 50.99   | 1914      | 47.2    | 3756      | 45.95   | 2914      | 2       | 7.02E-06       | 0.999992987    | 1.00E-09       |
| TLR4     | 52.91   | 5014      | 50.37   | 8974      | 50.64   | 6072      | 2       | 3.79E-05       | 0.999962074    | 1.00E-09       |
| BRD3     | 52.69   | 3655      | 55.74   | 5427      | 50.1    | 4890      | 2       | 0.000500749    | 0.999499253    | 1.00E-09       |
| USH2A    | 30.54   | 2338      | 30.7    | 4378      | 29.33   | 2578      | 3       | 0.000104937    | 1.00E-09       | 0.999895065    |
| RANBP10  | 34.81   | 4211      | 27.14   | 5763      | 32.27   | 5277      | 3       | 0.000101744    | 1.00E-09       | 0.999898258    |
| TMPRSS6  | 42.44   | 7205      | 33.56   | 15566     | 25.76   | 10423     | 3       | 0.001931863    | 1.05E-09       | 0.998068139    |
| NFKBIE   | 29.11   | 5084      | 21.17   | 6665      | 25.34   | 6902      | 3       | 0.001600139    | 1.00E-09       | 0.998399863    |

**(A):** BRD3; JMJD1C; MCCD1; TLR4; WSCD1; ZNF132

**(B):** BAIAP3; HERC6; METTL15; MORC1; NAP1L3; PPP1R13B

**(C):** TMPRSS6; USH2A; RANBP10

**(D):** NFKBIE

**(E):** DNMT3B

**(F):** SLC38A3

**(G):** CDX4

**(H):** SLC8A1

# Patient-7

## SciClone analysis

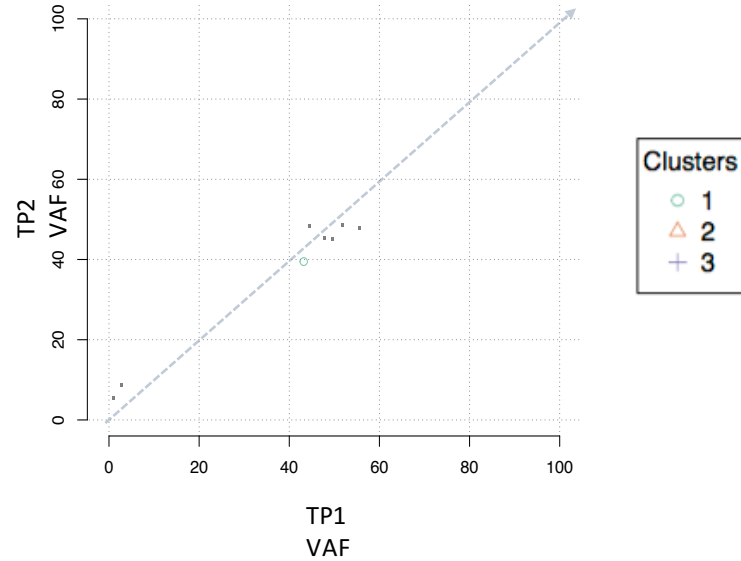

| Gene   | TP1.vaf | TP1.depth | TP2.vaf | TP2.depth | cluster | cluster.prob |
|--------|---------|-----------|---------|-----------|---------|--------------|
| RNPC3  | 2.7     | 185       | 8.64    | 2269      | 0       | NA           |
| AVPR1A | 50.8    | 67        | 49.18   | 1580      | 0       | NA           |
| COTL1  | 1       | 500       | 5.49    | 3060      | 0       | NA           |
| MYH4   | 47.9    | 532       | 45.44   | 9018      | 0       | NA           |
| ERAL1  | 51.8    | 502       | 48.63   | 8116      | 0       | NA           |
| ZBTB7C | 44.5    | 465       | 48.39   | 7264      | 0       | NA           |
| S1PR4  | 49.5    | 210       | 45.14   | 2984      | 0       | NA           |
| APBA3  | 42.6    | 49        | 49.4    | 2933      | 0       | NA           |
| MYO9B  | 55.6    | 568       | 47.94   | 16656     | 0       | NA           |
| N4BP3  | 43.2    | 132       | 39.48   | 2525      | 1       | 1.000000001  |

## Phylosub analysis

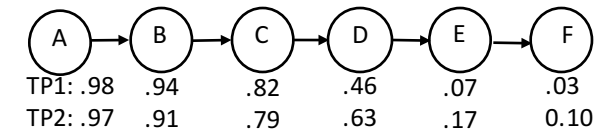

**(A):** APBA3; AVPR1A; ERAL1; MYO9B; ZBTB7C

**(B):** S1PR4; MYH4

**(C):** N4BP3

**(D):** empty

**(E):** RNPC3

**(F):** COTL1

### SciClone analysis

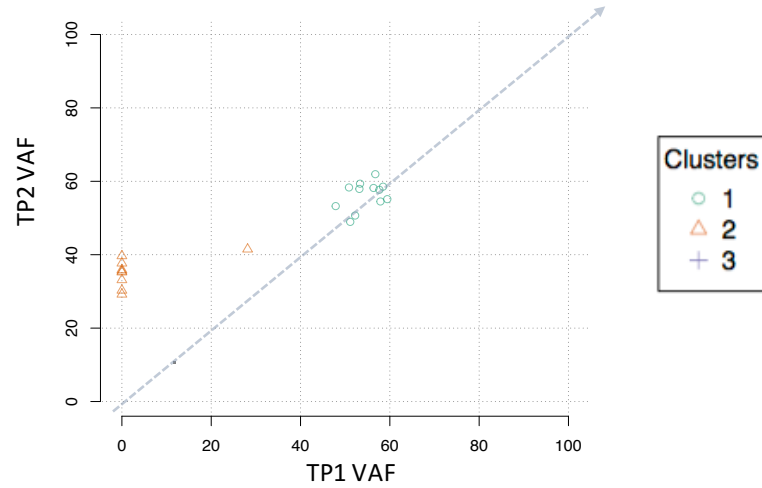

| Gene    | TP1.vaf | TP1.depth | TP2.vaf | TP2.depth | cluster | cluster.prob.1 | cluster.prob.2 |
|---------|---------|-----------|---------|-----------|---------|----------------|----------------|
| RNPC3   | 11.82   | 2107      | 10.74   | 3408      | 0       | NA             | NA             |
| DCST1   | 56.35   | 4712      | 58.18   | 4966      | 1       | 1.000000001    | 1.06E-09       |
| PIK3C2B | 53.33   | 3321      | 59.35   | 3808      | 1       | 1.000000001    | 1.02E-09       |
| PUS10   | 56.75   | 1621      | 61.94   | 1861      | 1       | 1.000000001    | 1.00E-09       |
| LRP1B   | 59.43   | 1503      | 55.14   | 1630      | 1       | 0.999999995    | 7.08E-09       |
| SF3B1   | 50.85   | 1233      | 58.32   | 1574      | 1       | 1.000000001    | 1.16E-09       |
| GABRG1  | 52.23   | 1179      | 50.67   | 920       | 1       | 0.999996327    | 3.68E-06       |
| JAK2    | 51.13   | 1172      | 48.94   | 1289      | 1       | 0.999913268    | 8.67E-05       |
| DFNB31  | 58.48   | 5705      | 58.54   | 7229      | 1       | 1.000000001    | 1.05E-09       |
| USP47   | 53.18   | 1213      | 57.92   | 2419      | 1       | 1.000000001    | 1.11E-09       |
| IGLL5   | 57.66   | 4152      | 57.69   | 3855      | 1       | 1.000000001    | 1.13E-09       |
| IGLL5   | 57.89   | 7304      | 54.5    | 7105      | 1       | 0.999999992    | 1.03E-08       |
| LMF2    | 47.87   | 7708      | 53.24   | 8599      | 1       | 0.999999086    | 9.16E-07       |
| HCN1    | 28.15   | 1002      | 41.49   | 1458      | 2       | 1.00E-09       | 1.000000001    |
| VCAN    | 0       | 1066      | 35.25   | 1061      | 2       | 1.00E-09       | 1.000000001    |
| SLC35G1 | 0.1     | 7116      | 37.68   | 7293      | 2       | 1.00E-09       | 1.000000001    |
| ATHL1   | 0.05    | 5695      | 35.88   | 4142      | 2       | 1.00E-09       | 1.000000001    |
| ARF6    | 0.04    | 5054      | 35.48   | 4377      | 2       | 1.00E-09       | 1.000000001    |
| TP53    | 0.05    | 15586     | 29.21   | 10931     | 2       | 1.00E-09       | 1.000000001    |
| OTOP3   | 0.08    | 13442     | 30.29   | 12172     | 2       | 1.00E-09       | 1.000000001    |
| BFSP1   | 0.14    | 727       | 33.14   | 652       | 2       | 1.00E-09       | 1.000000001    |
| UMODL1  | 0.29    | 6157      | 39.67   | 5415      | 2       | 1.00E-09       | 1.000000001    |

### Phylosub analysis

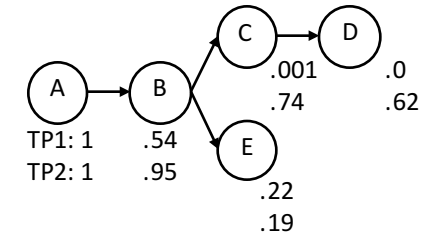

- (A):** DCST1; DFNB31; GABRG1; IGLL5; JAK2; LMF2; LRP1B; PIK3C2B; PUS10; SF3B1; USP47
- (B):** HCN1
- (C):** ARF6; ATHL1; UMODL1; VCAN; SLC35G1
- (D):** TP53; BFSP1; OTOP3
- (E):** RNPC3

# Patient-10

## SciClone analysis

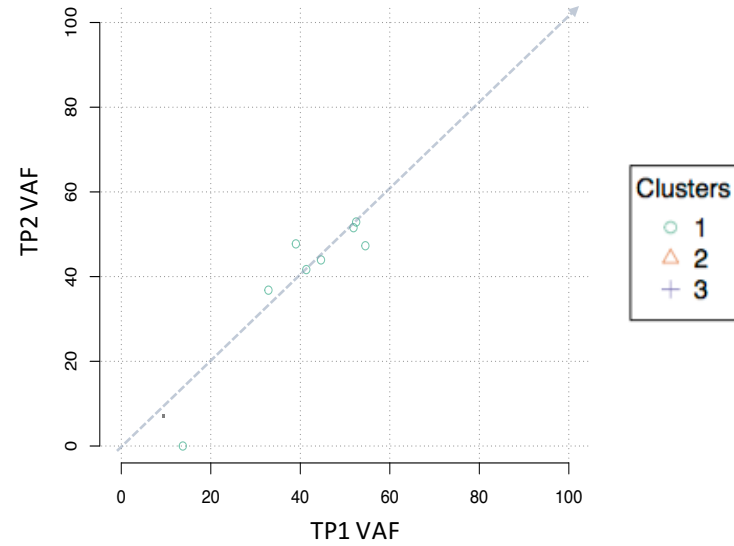

| Gene     | TP1.vaf | TP1.depth | TP2.vaf | TP2.depth | cluster | cluster.prob |
|----------|---------|-----------|---------|-----------|---------|--------------|
| PLEKHH1  | 9.43    | 3828      | 7.14    | 1625      | 0       | NA           |
| GLB1L    | 32.88   | 2707      | 36.8    | 4293      | 1       | 1.000000001  |
| A4GNT    | 44.62   | 10399     | 43.94   | 8496      | 1       | 1.000000001  |
| KLHL6    | 54.54   | 7451      | 47.29   | 5948      | 1       | 1.000000001  |
| C9orf152 | 52.49   | 2738      | 52.9    | 2476      | 1       | 1.000000001  |
| FAN1     | 39.01   | 2612      | 47.73   | 2458      | 1       | 1.000000001  |
| ZNF423   | 51.89   | 5115      | 51.55   | 2826      | 1       | 1.000000001  |
| ZNF793   | 41.34   | 8582      | 41.66   | 8041      | 1       | 1.000000001  |

## Phylosub analysis

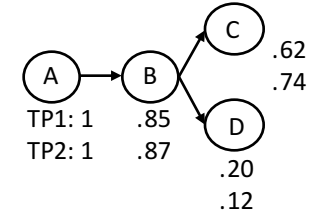

**(A):** *C9orf152*; *KLHL6*; *ZNF423*

**(B):** *A4GNT*; *ZNF793*; *FAN1*

**(C):** *GLB1L*

**(D):** *PLEKHH1*

### SciClone analysis

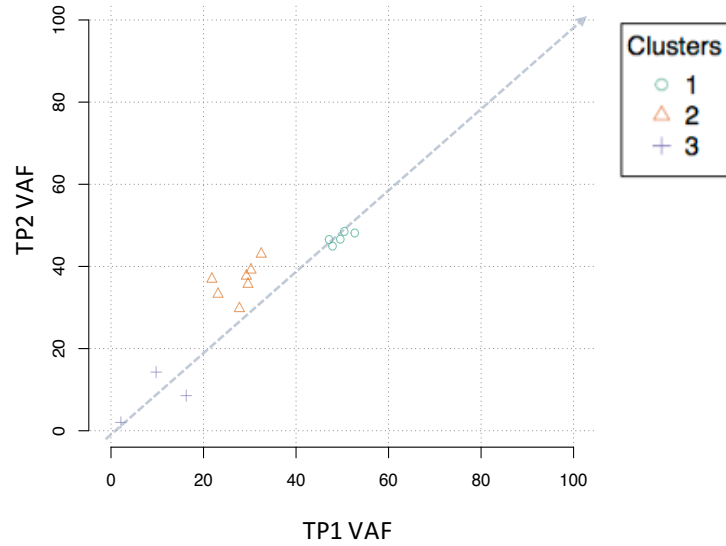

| Gene     | TP1.vaf | TP1.depth | TP2.vaf | TP2.depth | cluster | cluster.prob.1 | cluster.prob.2 | cluster.prob.3 |
|----------|---------|-----------|---------|-----------|---------|----------------|----------------|----------------|
| OBSL1    | 47.89   | 4920      | 44.95   | 5003      | 1       | 0.999999966    | 3.64E-08       | 1.00E-09       |
| CDHR4    | 49.57   | 5005      | 46.63   | 6142      | 1       | 1              | 1.66E-09       | 1.00E-09       |
| ADRA1B   | 50.43   | 5243      | 48.52   | 5482      | 1       | 1.000000001    | 1.04E-09       | 1.00E-09       |
| NCAPG2   | 52.69   | 6924      | 48.14   | 7921      | 1       | 1.000000001    | 1.00E-09       | 1.00E-09       |
| OAS3     | 47.13   | 1935      | 46.55   | 3216      | 1       | 0.999999969    | 3.29E-08       | 1.00E-09       |
| PRAMEF12 | 30.26   | 10314     | 39.14   | 11451     | 2       | 1.56E-09       | 1              | 1.00E-09       |
| ITGA6    | 29.61   | 6008      | 35.67   | 5865      | 2       | 1.00E-09       | 1.000000001    | 1.00E-09       |
| ARMC8    | 32.47   | 2513      | 43      | 1530      | 2       | 2.74E-06       | 0.999997262    | 1.00E-09       |
| GP5      | 23.14   | 6335      | 33.26   | 7171      | 2       | 1.00E-09       | 1.000000001    | 1.00E-09       |
| MICAL2   | 29.27   | 4045      | 37.65   | 5116      | 2       | 1.01E-09       | 1.000000001    | 1.00E-09       |
| CUL5     | 21.81   | 2980      | 36.91   | 3278      | 2       | 1.00E-09       | 1.000000001    | 1.00E-09       |
| DPH3P1   | 27.76   | 3635      | 29.76   | 3051      | 2       | 1.00E-09       | 1.000000001    | 1.00E-09       |
| CADM2    | 9.76    | 5256      | 14.27   | 4919      | 3       | 1.00E-09       | 1.00E-09       | 1.000000001    |
| OR4D5    | 16.26   | 2054      | 8.56    | 2336      | 3       | 1.00E-09       | 1.00E-09       | 1.000000001    |
| CNGB1    | 2.14    | 10935     | 2.02    | 9752      | 3       | 1.00E-09       | 1.00E-09       | 1.000000001    |

### Phylosub analysis

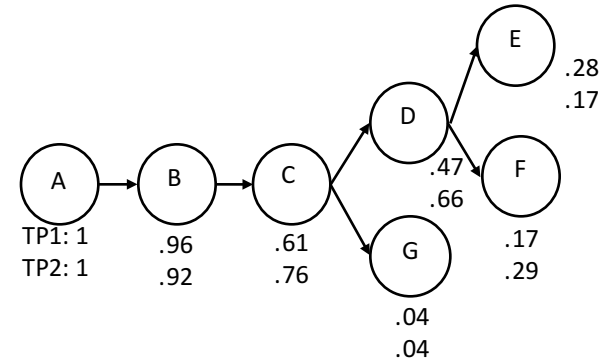

- (A):** ADRA1B; CAAP1; NCAPG2
- (B):** CDHR4; OAS3; OBSL1
- (C):** PRAMEF12; ARMC8; ITGA6; MICAL2
- (D):** GP5; CUL5; DPH3P1
- (E):** OR4D5
- (F):** CADM2
- (G):** CNGB1
